# Supplementary material
Source: PubMed Central journal article supplement (PMC3234871)
Supplement: supp_M111.225185_jbc.M111.225185-1.pdf [file supp_M111.225185_jbc.M111.225185-1.pdf]

Supplemental Data

Figure S1

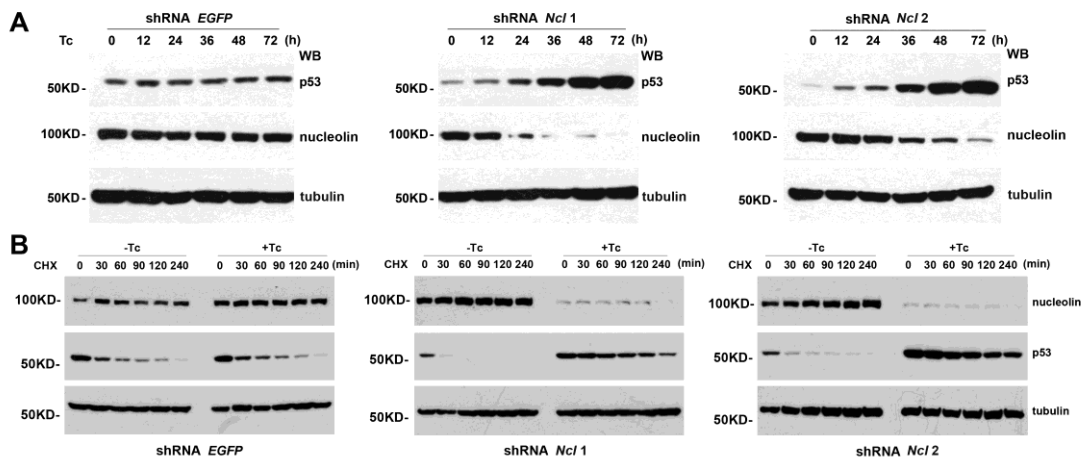

**FIGURE S1. Knock-down nucleolin in ESCs resulted in increased p53 protein levels and its protein stability.** *A*, the kinetics of p53 protein levels was determined by Western blot analysis in shRNA *nucleolin* and shRNA *EGFP* ESCs treated with Tc for indicated time. *B*, the protein levels of p53 in shRNA *nucleolin* and shRNA *EGFP* ESCs that cultured with or without Tc for 2days and then treated with cycloheximide (CHX) for the indicated time were detected by Western blotting.
